# Supplementary material for: ROR1 regulates chemoresistance in Breast Cancer via modulation of drug efflux pump ABCB1
Source: PubMed Central journal article supplement (PMC7000766; doi:10.1038/s41598-020-58864-0), 2020-02-04
Supplement: 41598_2020_58864_MOESM1_ESM.pdf [file 41598_2020_58864_MOESM1_ESM.pdf]

# ROR1 regulates chemoresistance in Breast Cancer via modulation of drug efflux pump ABCB1

Norman Fultang<sup>1</sup>, Abhinav Illendula<sup>1</sup>, Jianhuang Lin<sup>2</sup>, Manoj K. Pandey<sup>3</sup>, Zachary Klase<sup>1</sup>, Bela Peethambaran<sup>1,\*</sup>.

<sup>1</sup> Department of Biological Sciences, University of the Sciences in Philadelphia, Philadelphia, Pennsylvania, 19104 United States of America

<sup>2</sup> The Wistar Institute, Philadelphia, Pennsylvania, 19104, United States of America

<sup>3</sup> Department of Biomedical Sciences, Cooper Medical School of Rowan University, Camden, New Jersey, 08103, USA

\* Corresponding author: Bela Peethambaran, PhD:

[b.peethambaran@usciences.edu](mailto:b.peethambaran@usciences.edu)

Figure S1

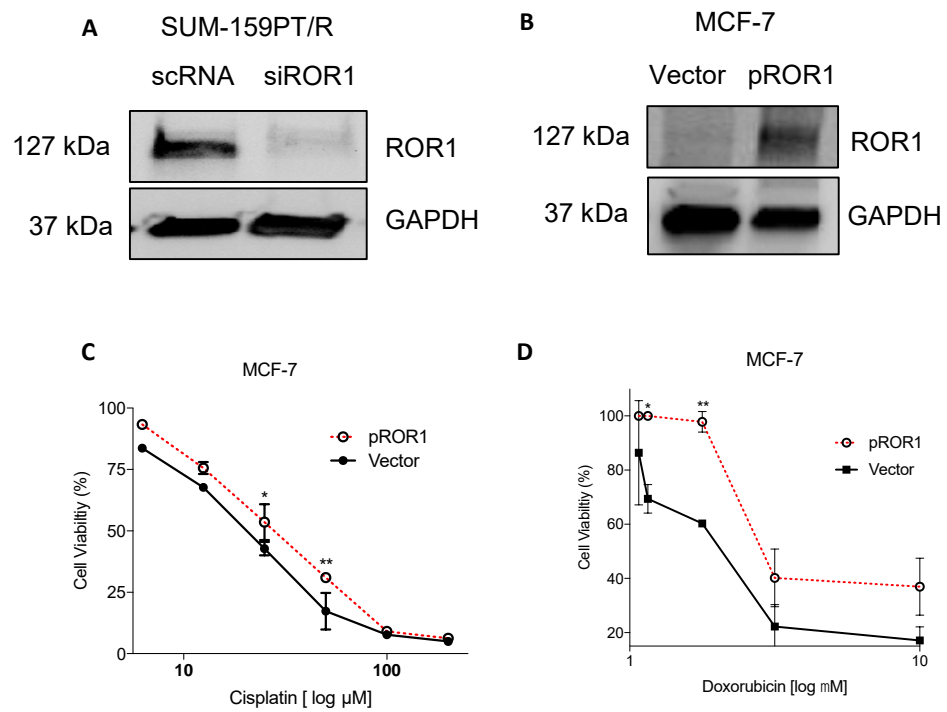

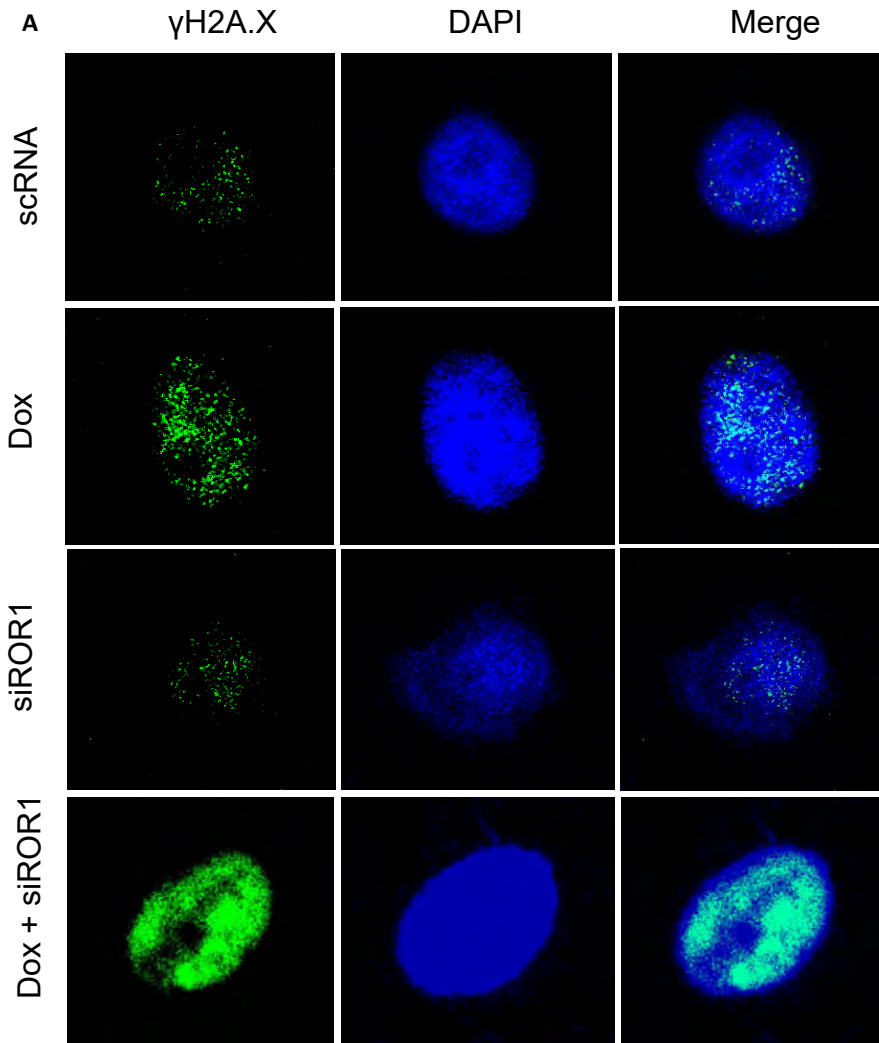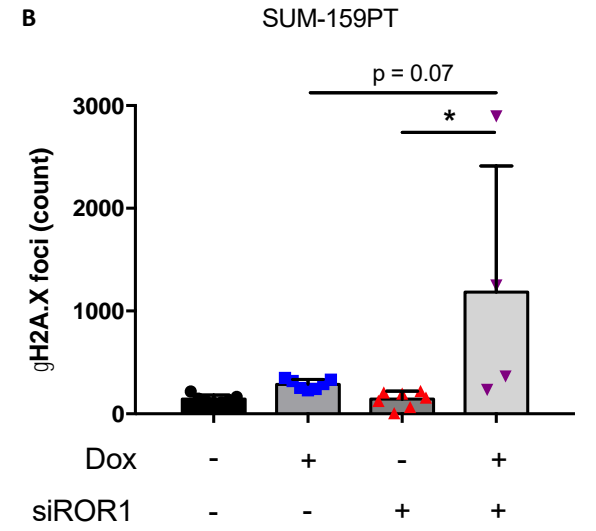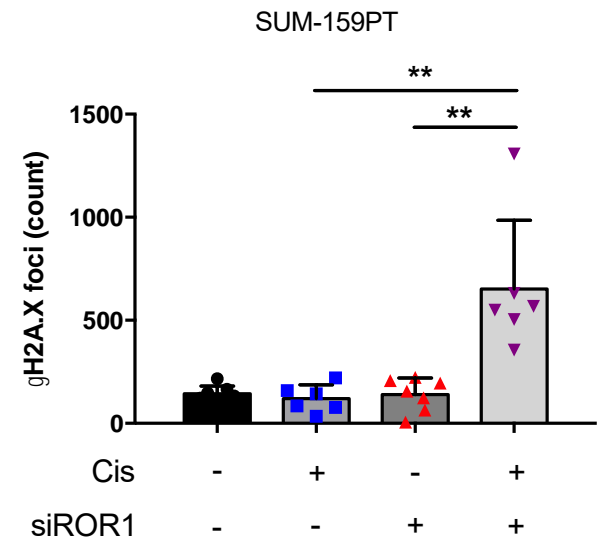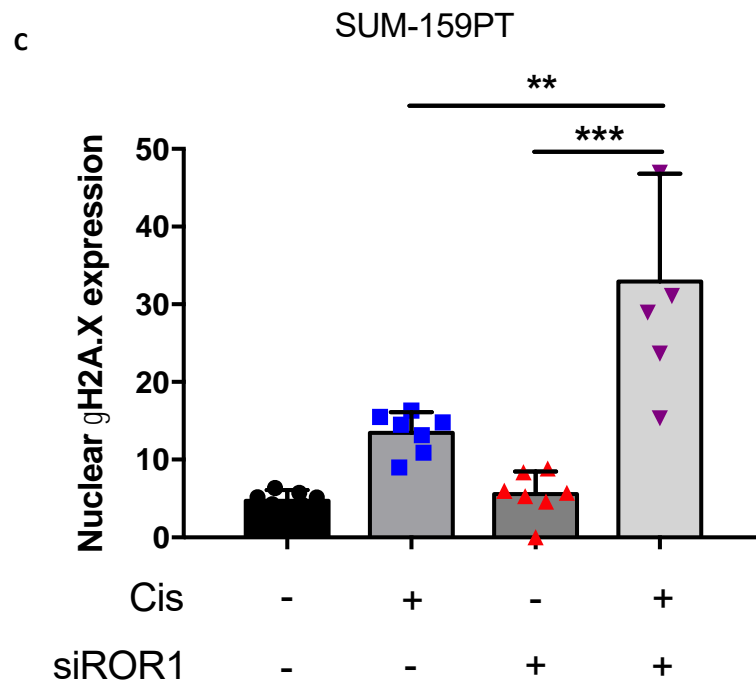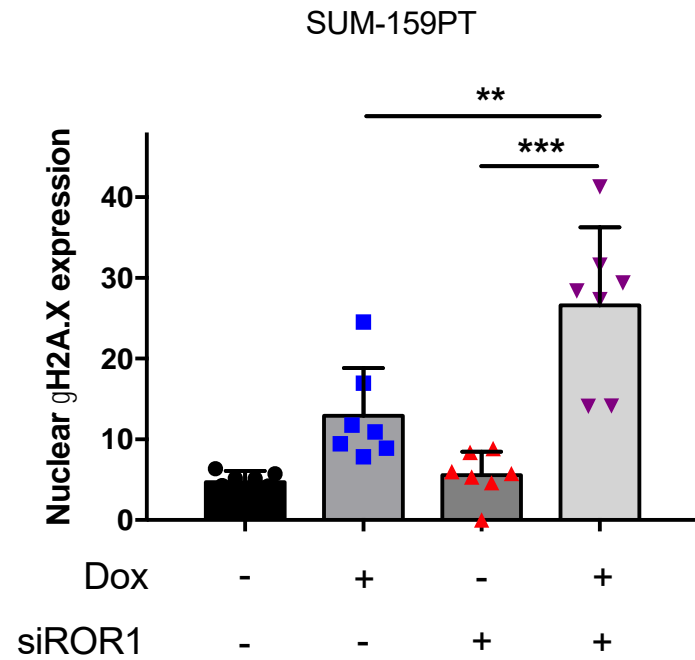

**Figure S3**

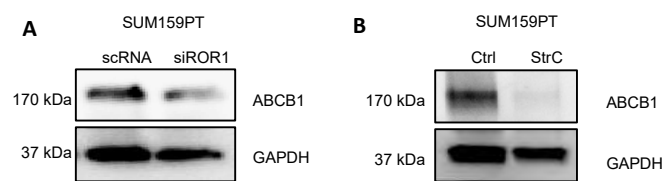

Figure S4

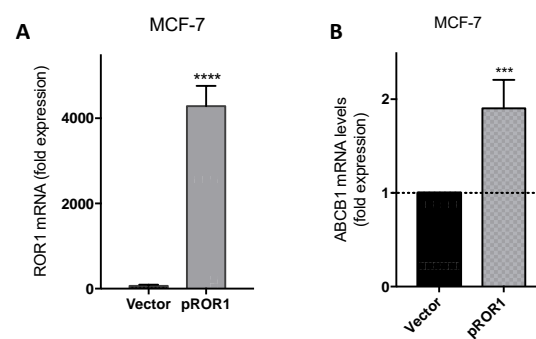

Figure S5

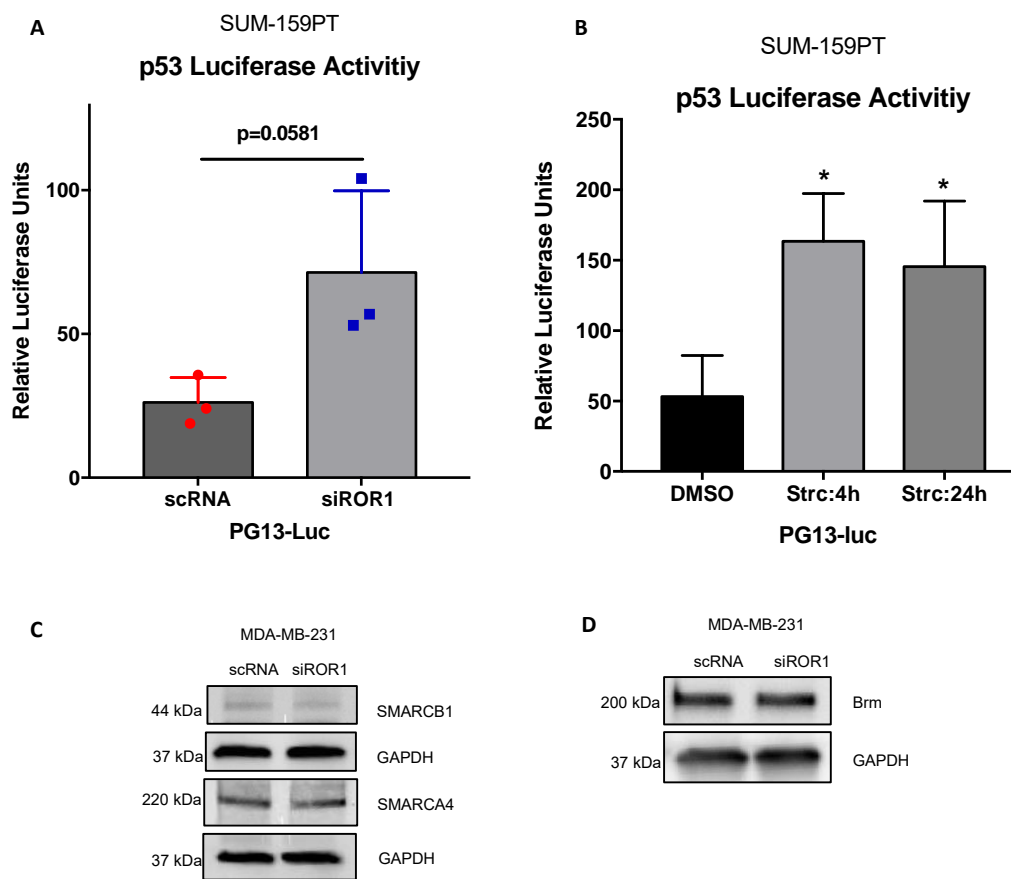

Figure S6

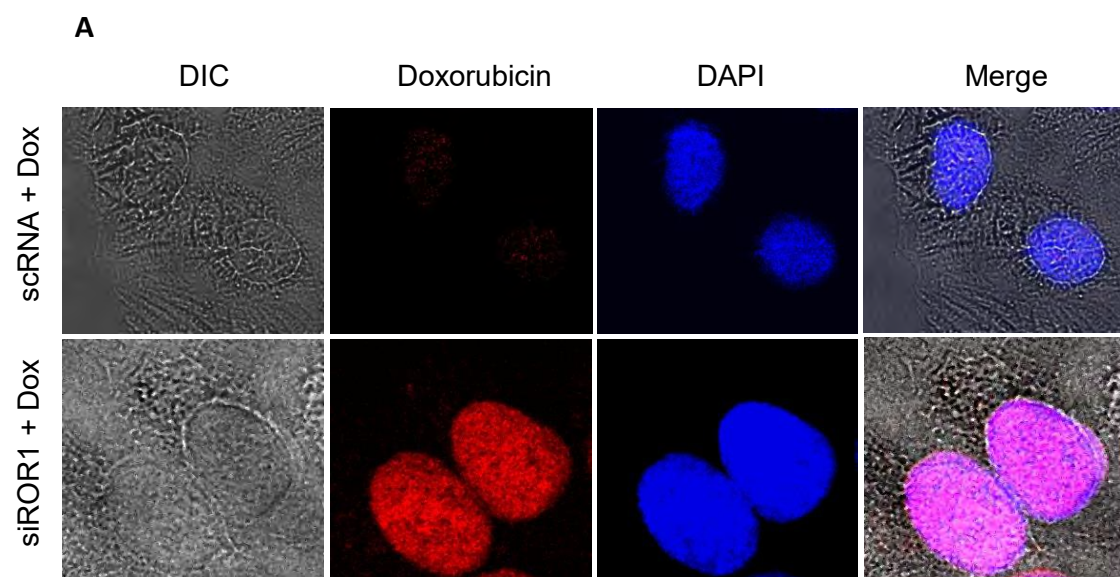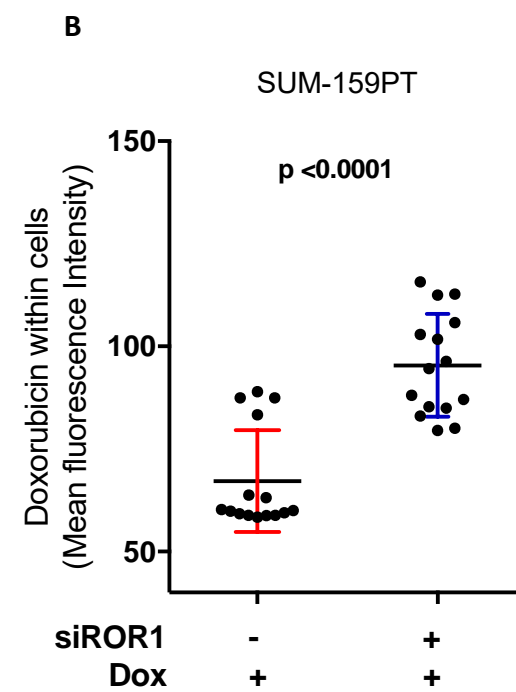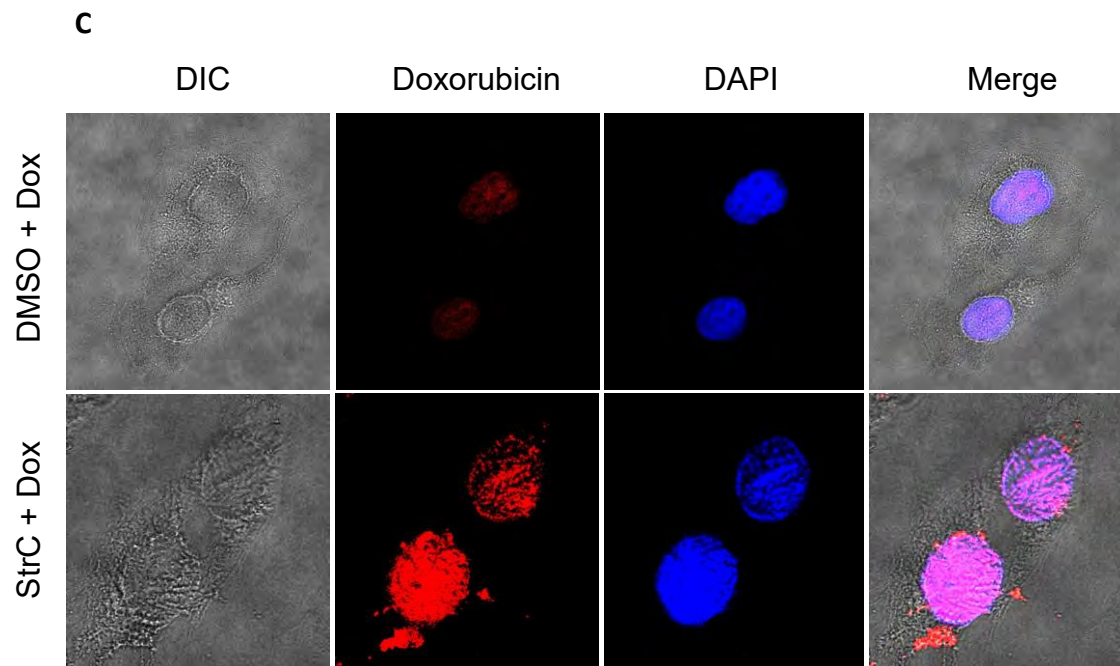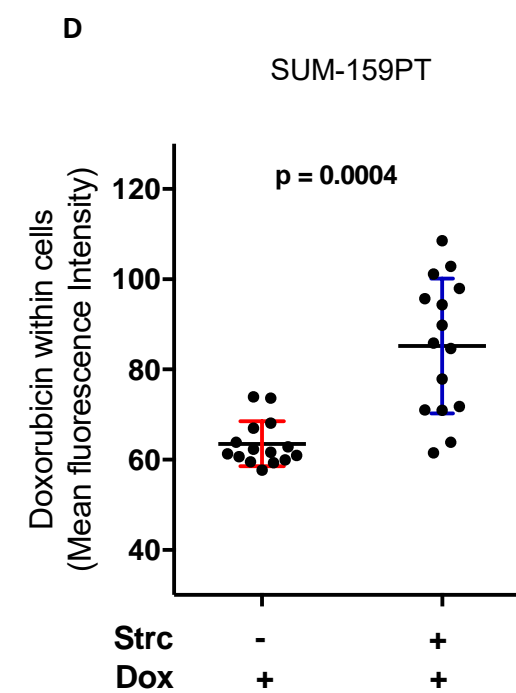

# Supporting gel data fig 1D

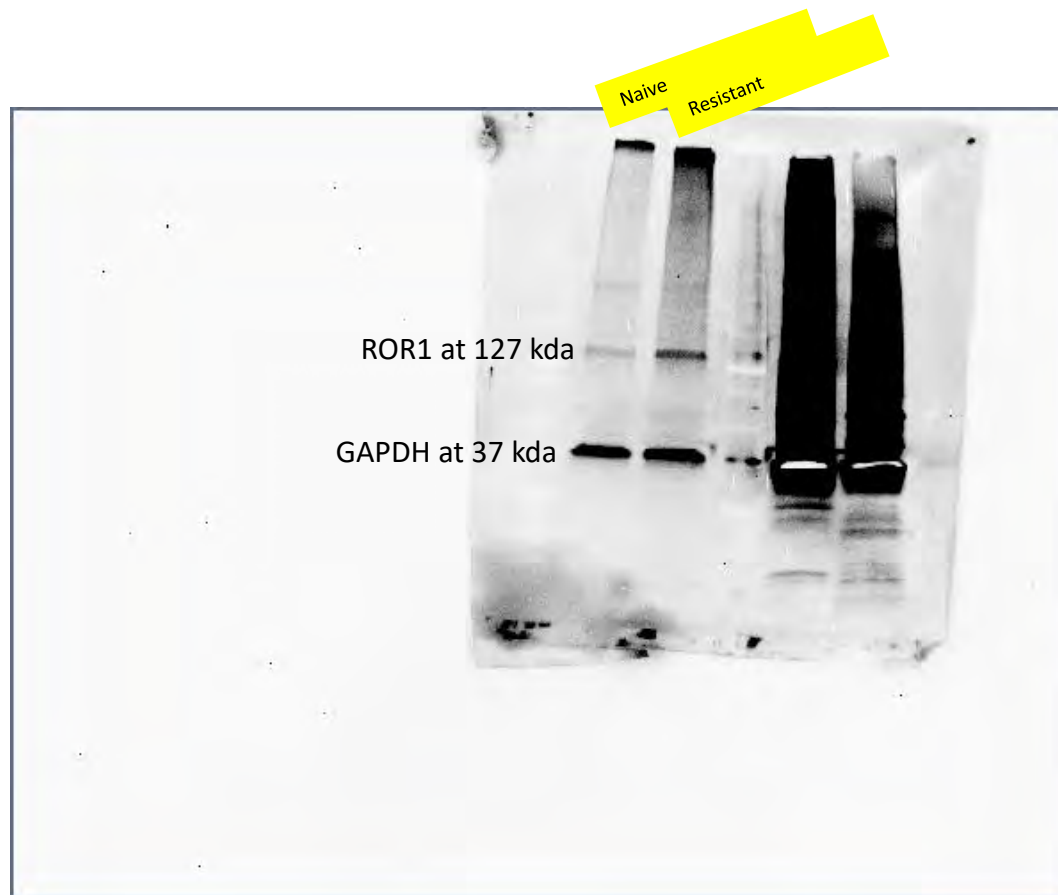



# Supporting gel data fig 2A

Figure 2a.

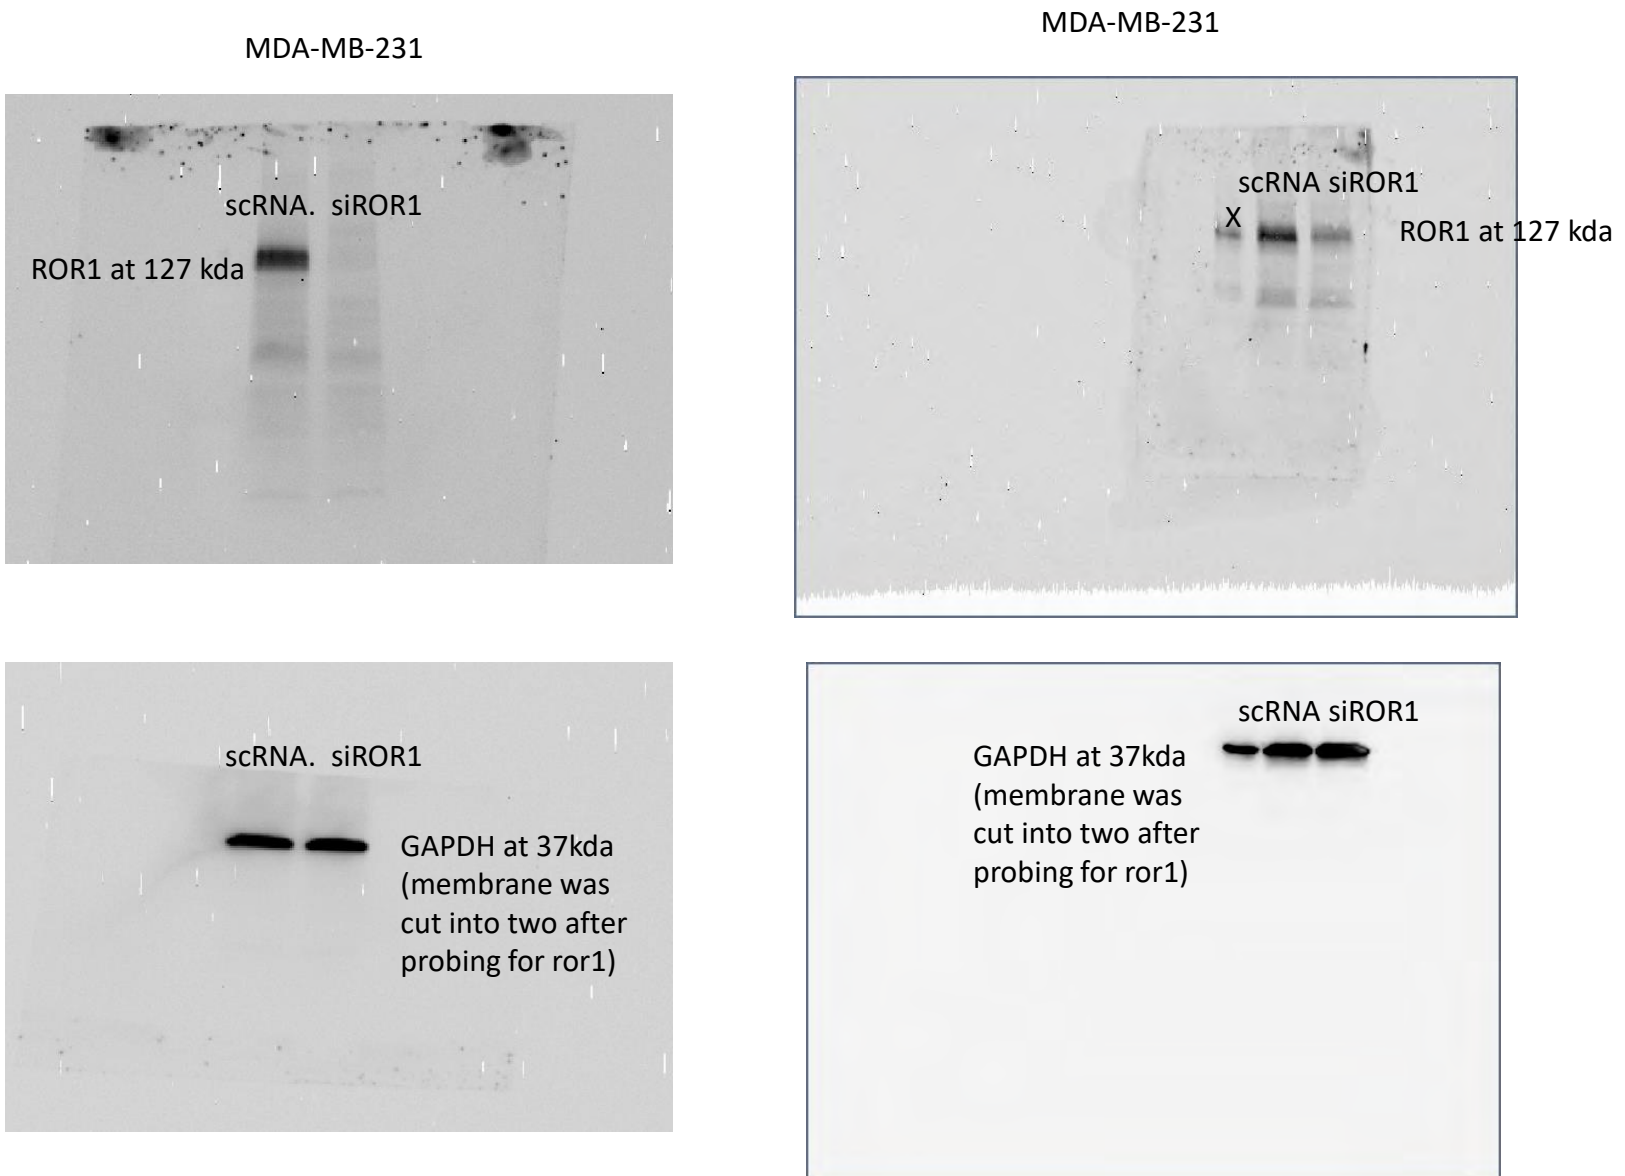

# Supporting gel data figure 4A

Figure S9

First panel fig. 4a

Ran on same gel used as first panel of fig 2a.

MDA-MB-231

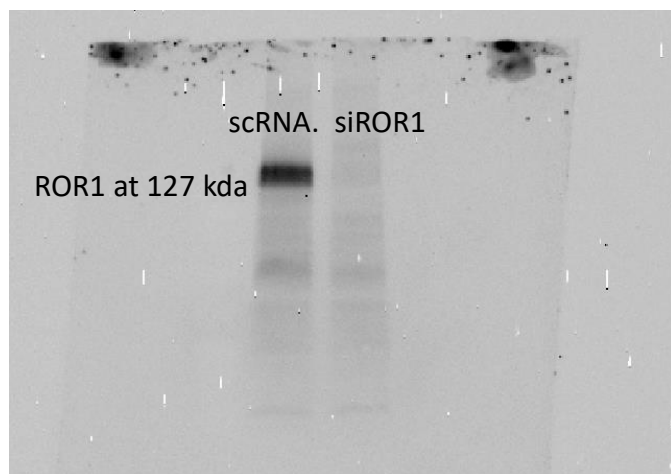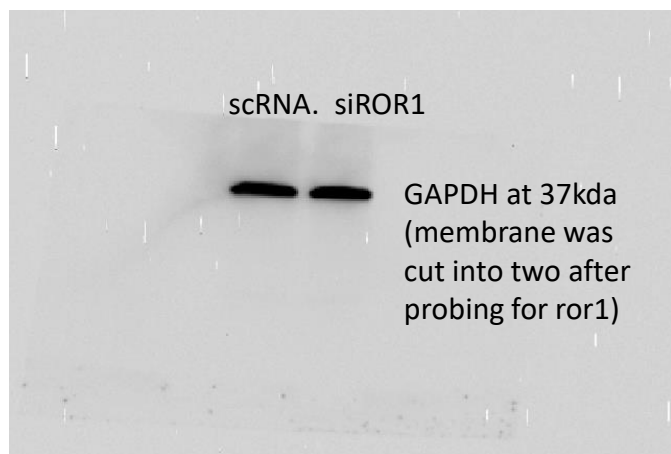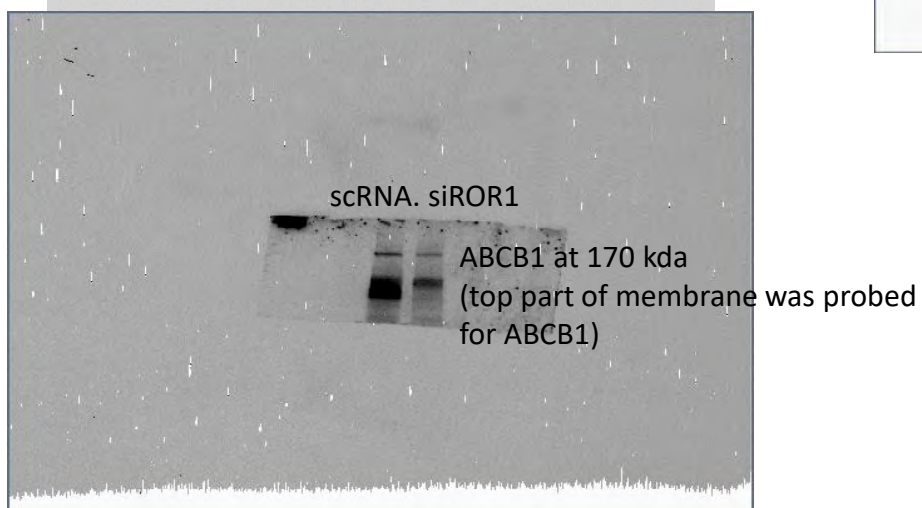

Second panel fig. 4a

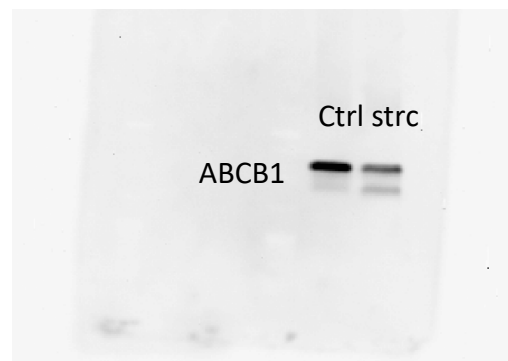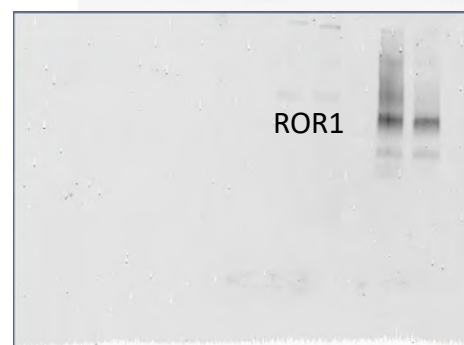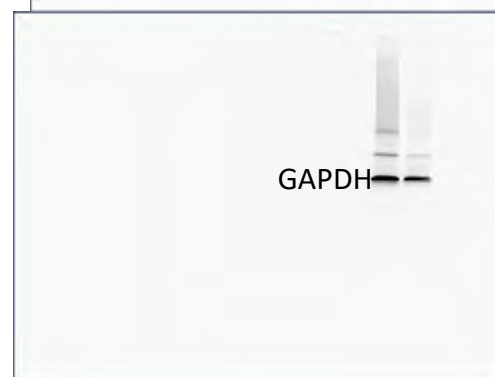

# Supporting gel data figure 5B

Figure S10

1

First, we probed whole ERK

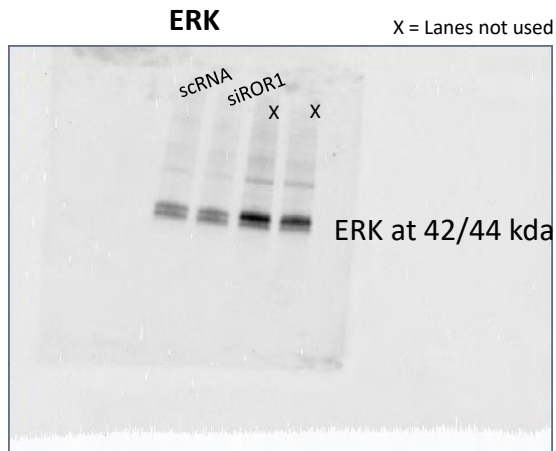

2

We then probed p-MEK

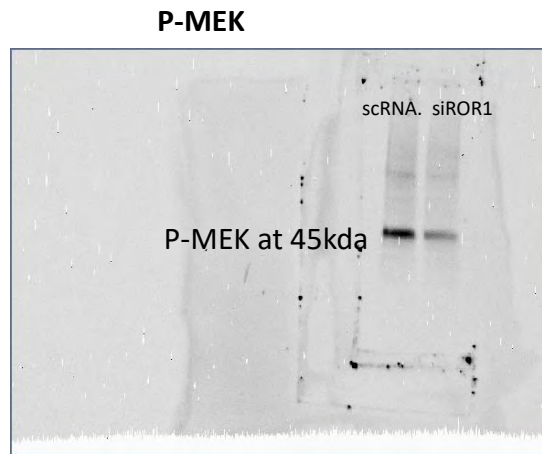

3

We then stripped the membrane one more time and probed p-ERK

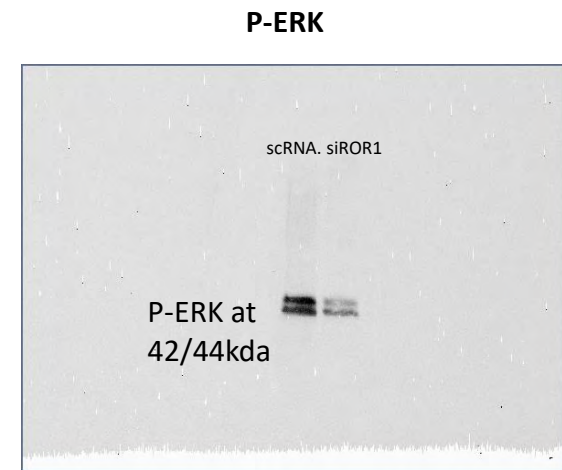

2

We then cut the membrane in between lanes 2 and 3, and stripped it using a harsh stripping buffer (abcam: <https://www.abcam.com/ps/pdf/protocols/stripping%20for%20reprobing.pdf>)

Then GAPDH

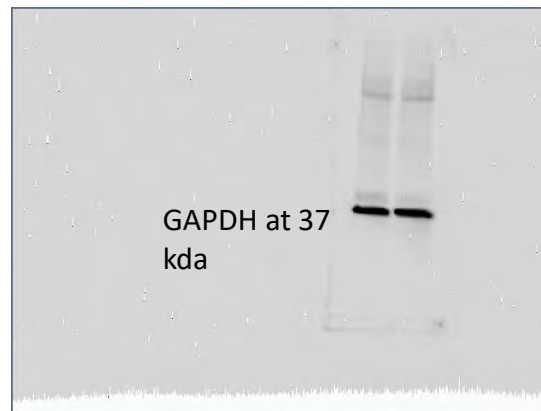

# Supporting gel data figure 5B continued

Figure S11

This was run on a new membrane

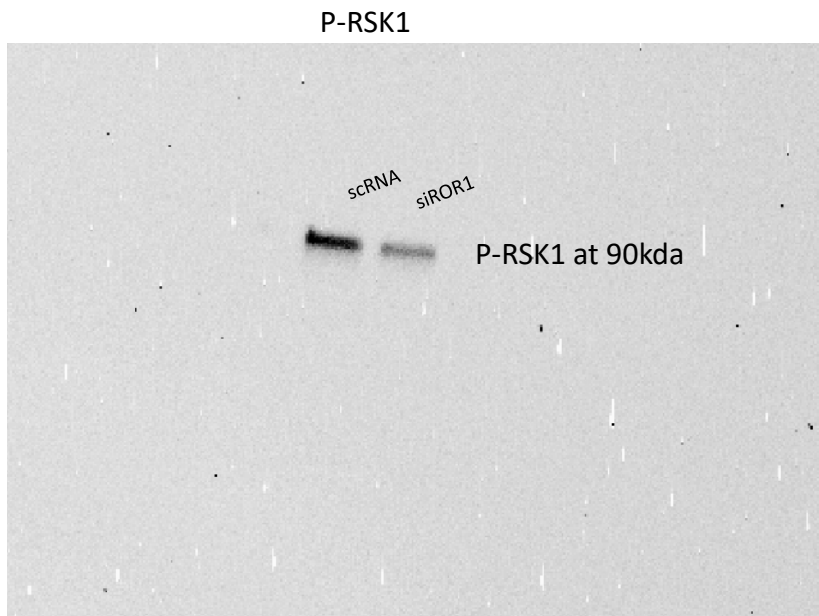

Second panel fig. 4a

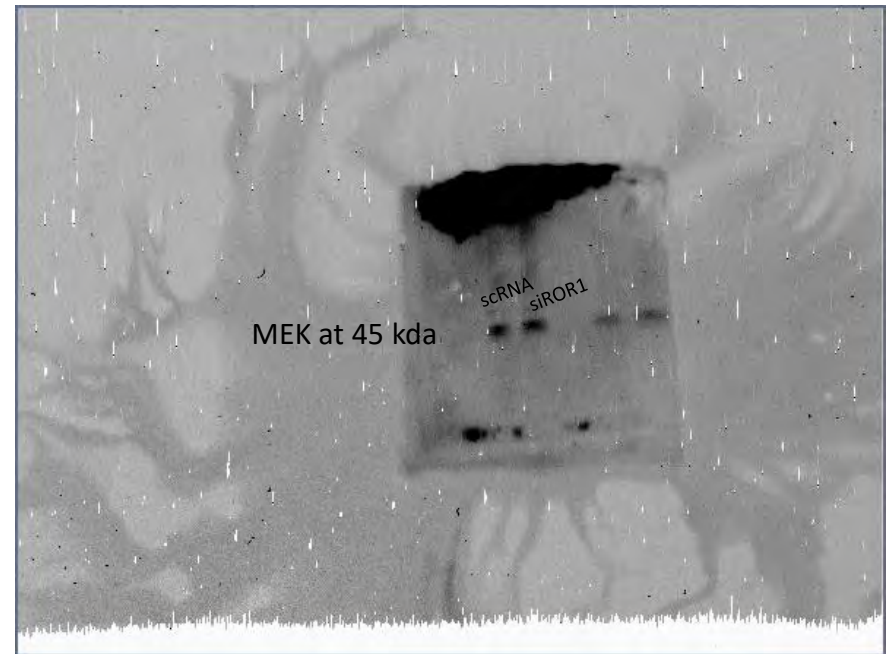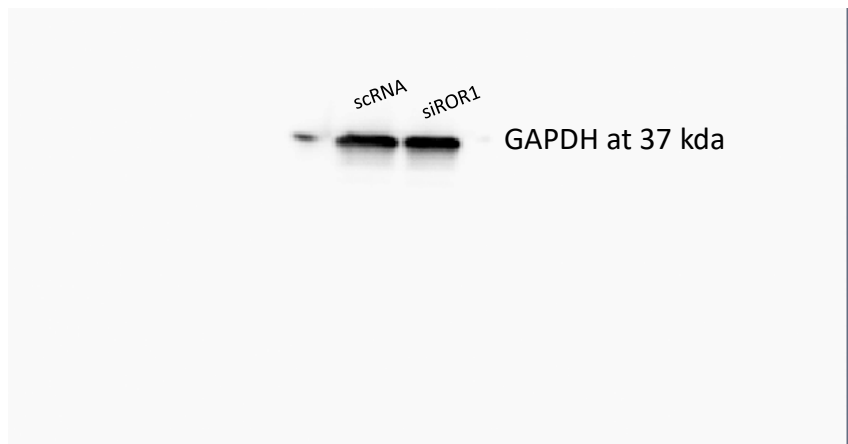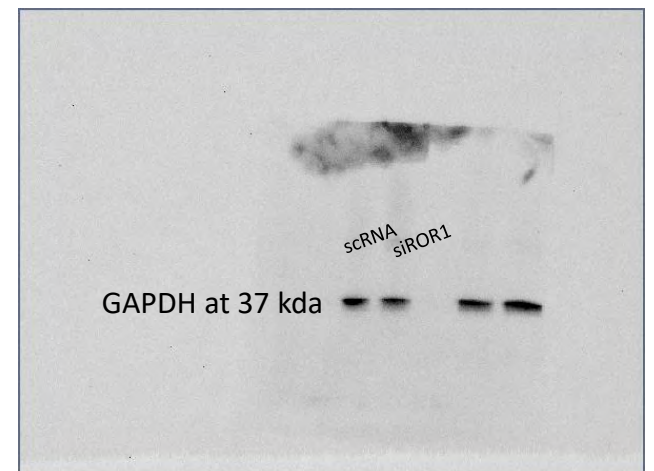

# Supporting gel data figure 6B

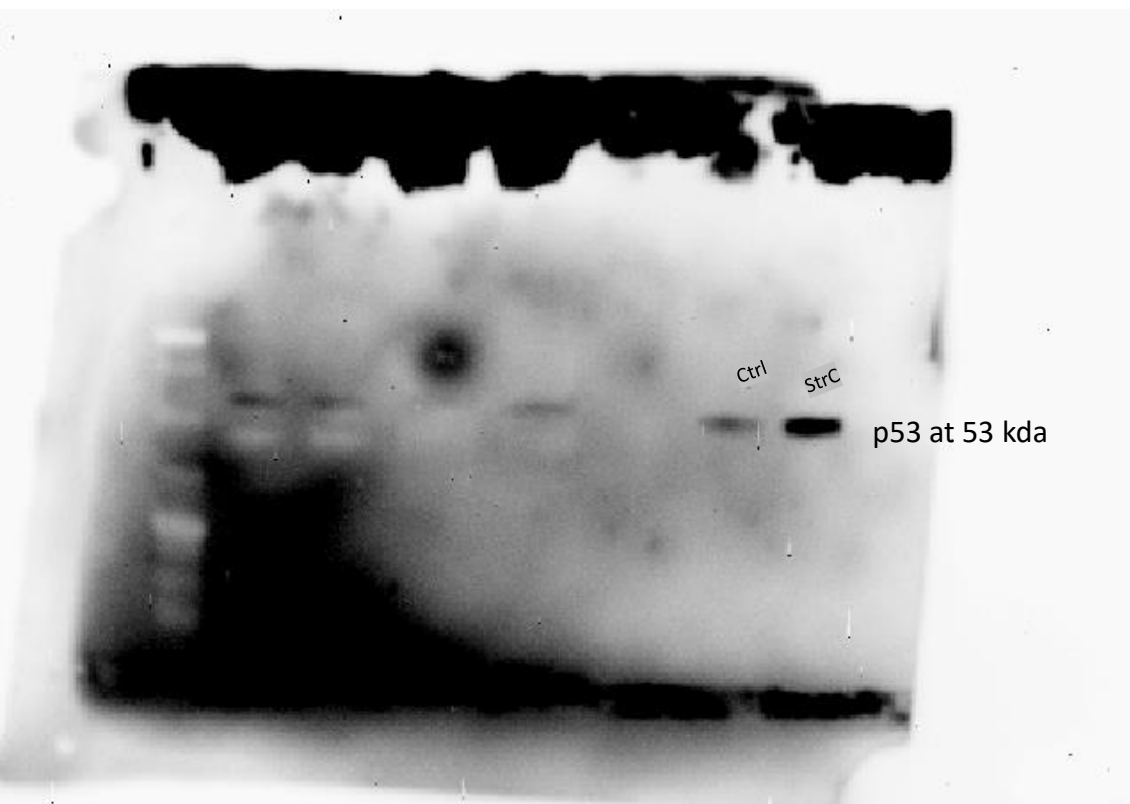

Membrane was then cut cross at around 50 kda

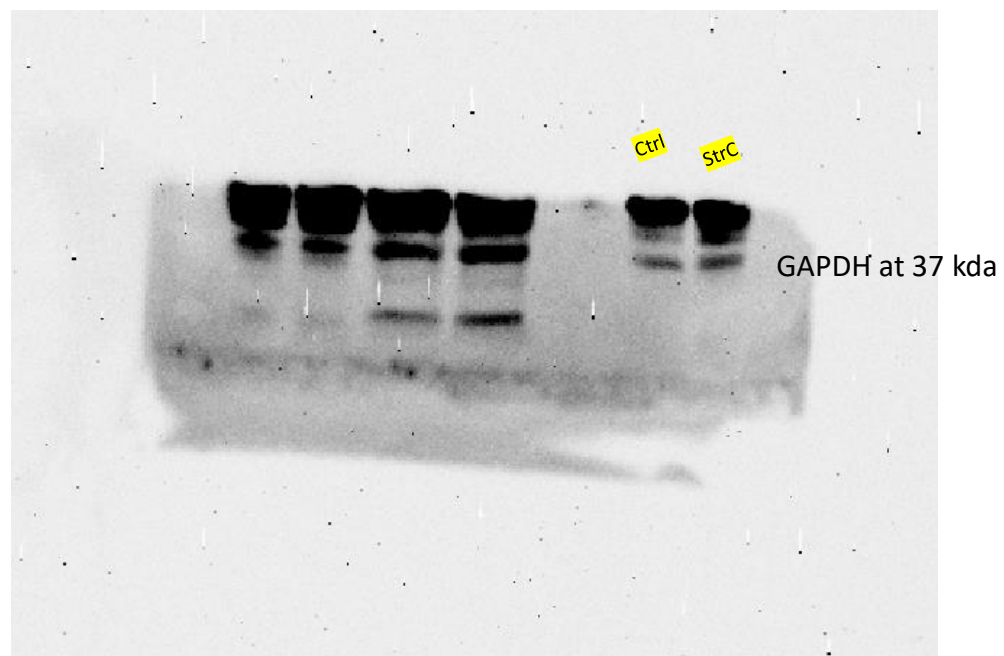

# Supporting gel data figure 6B continued

Figure S13

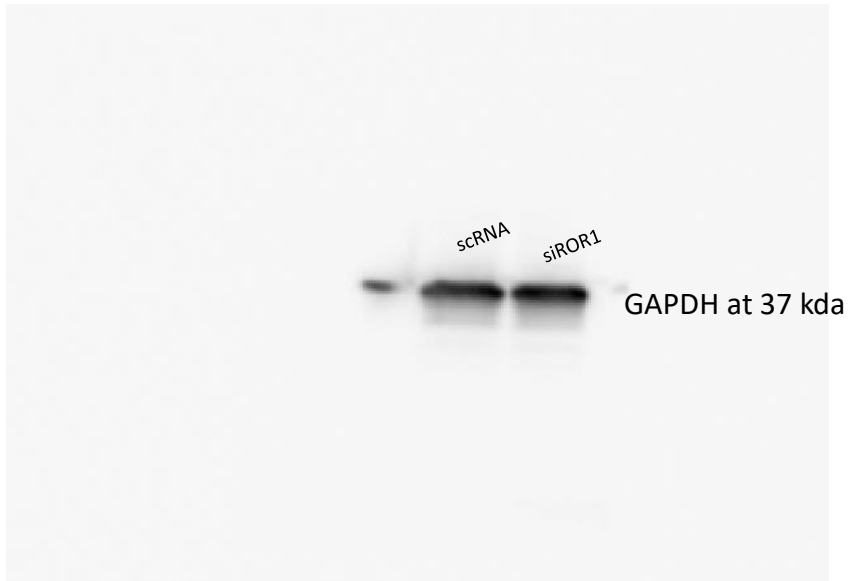

Membrane was then cut cross at around 60 kda

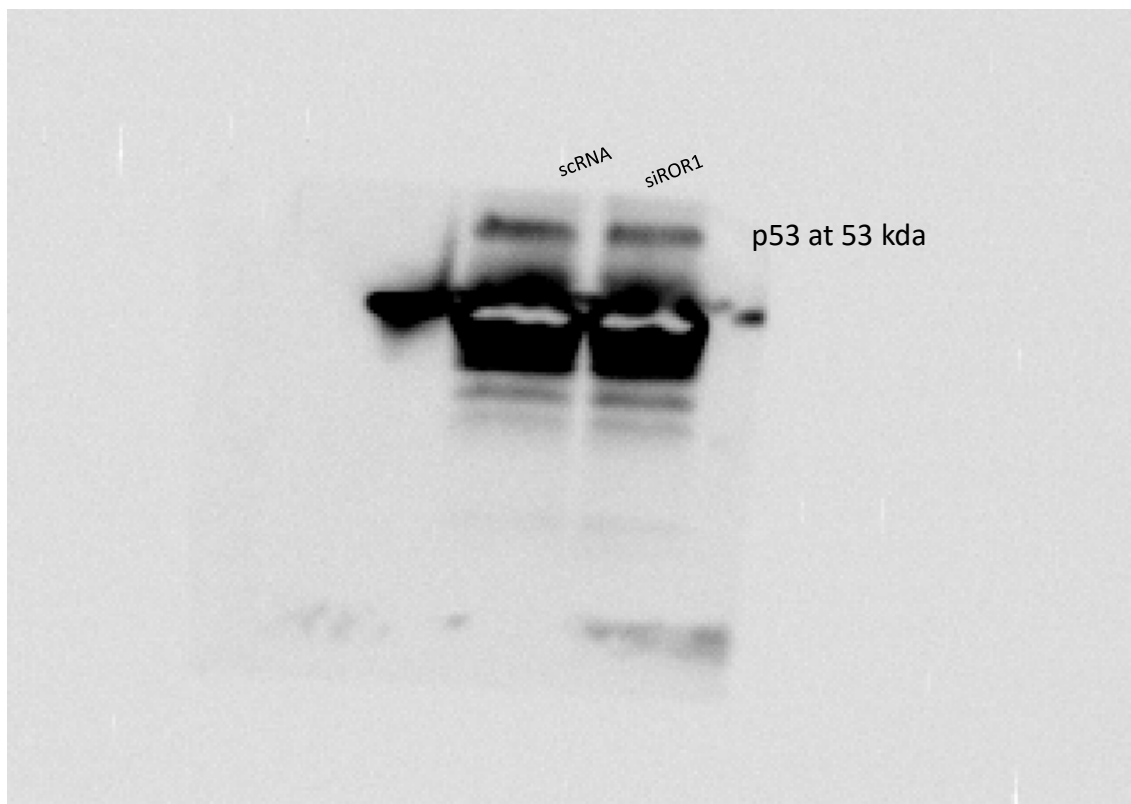



# Supporting gel data figure 6C

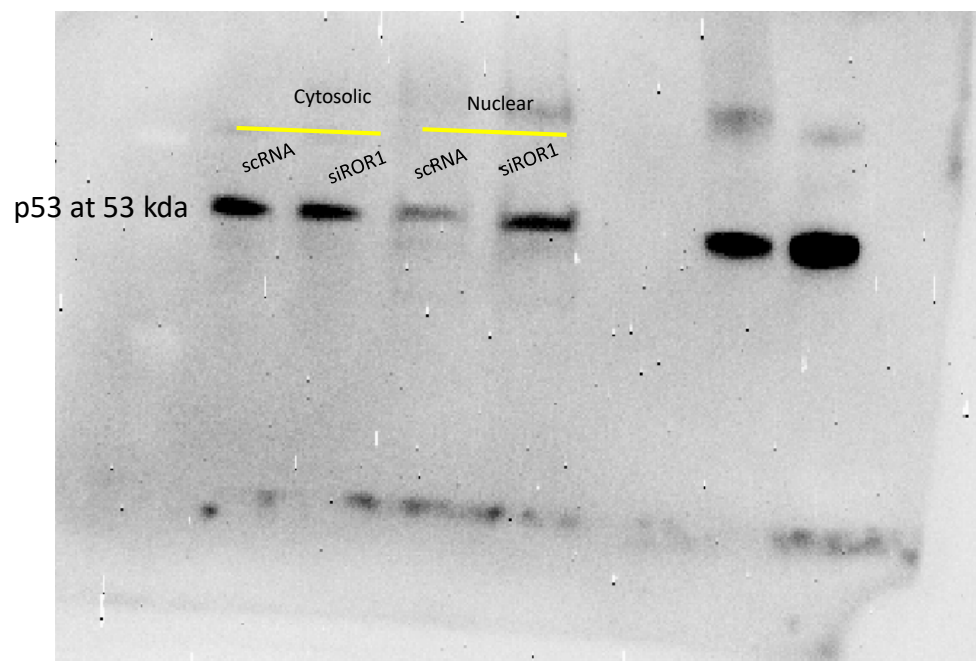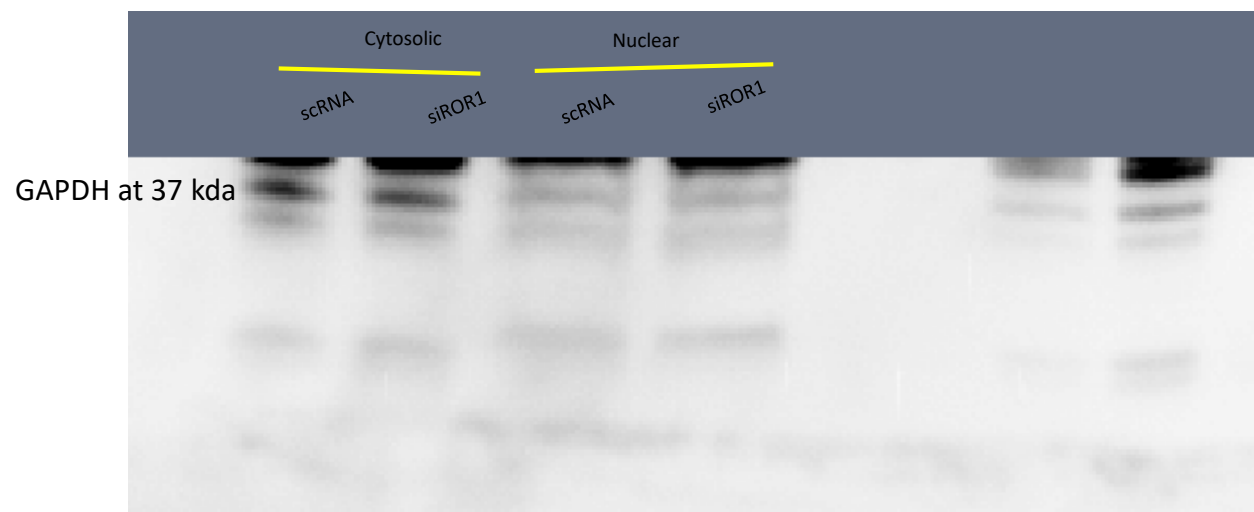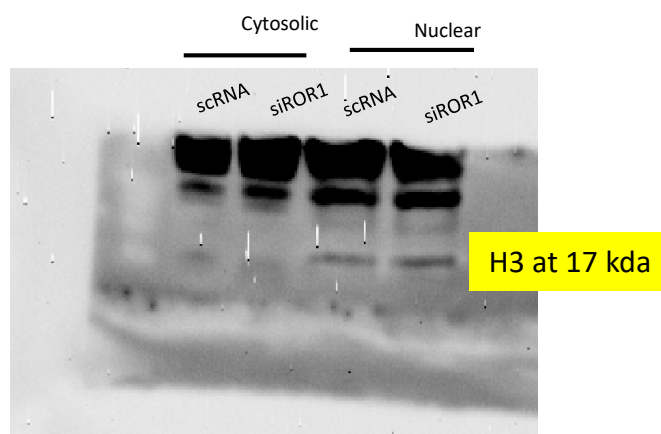

# Supporting gel data figure S1A

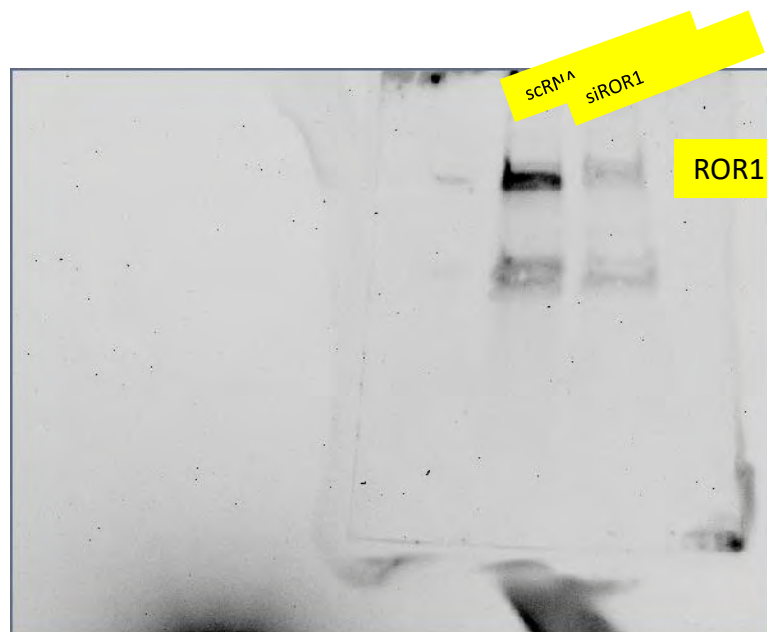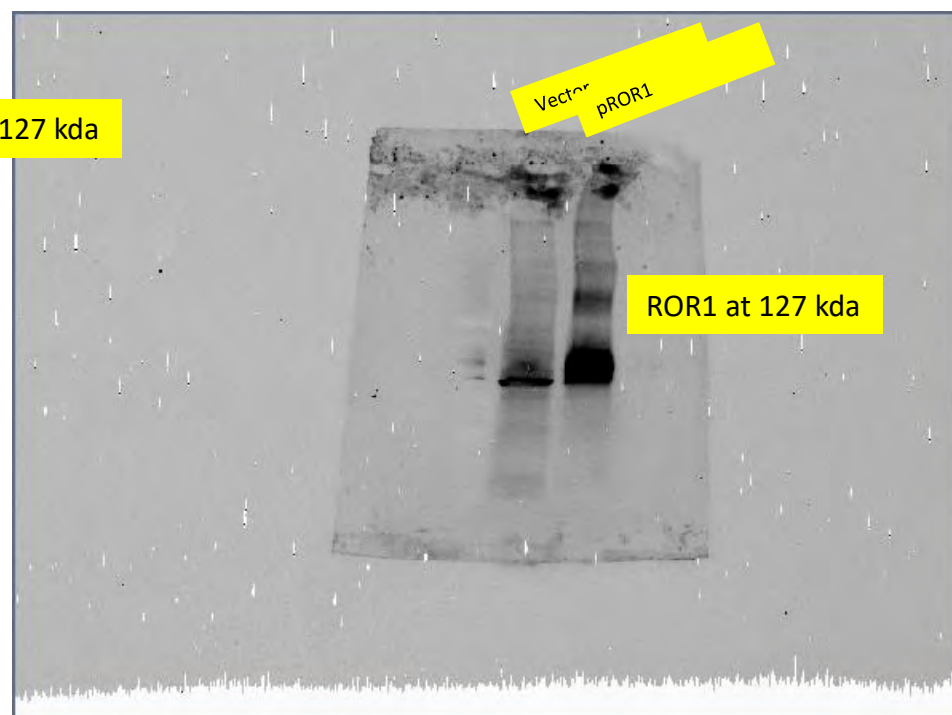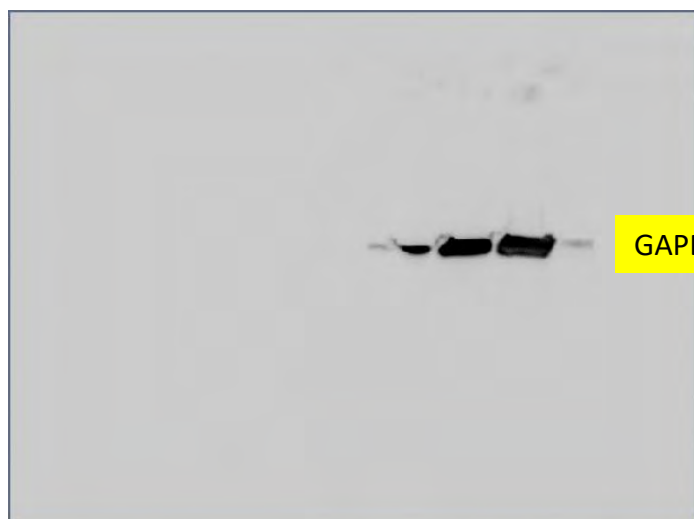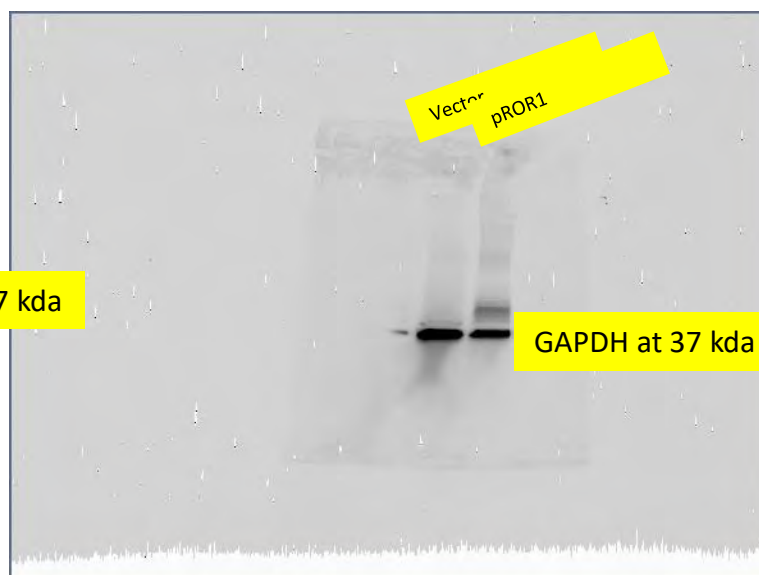



# Supporting gel data figure S3A

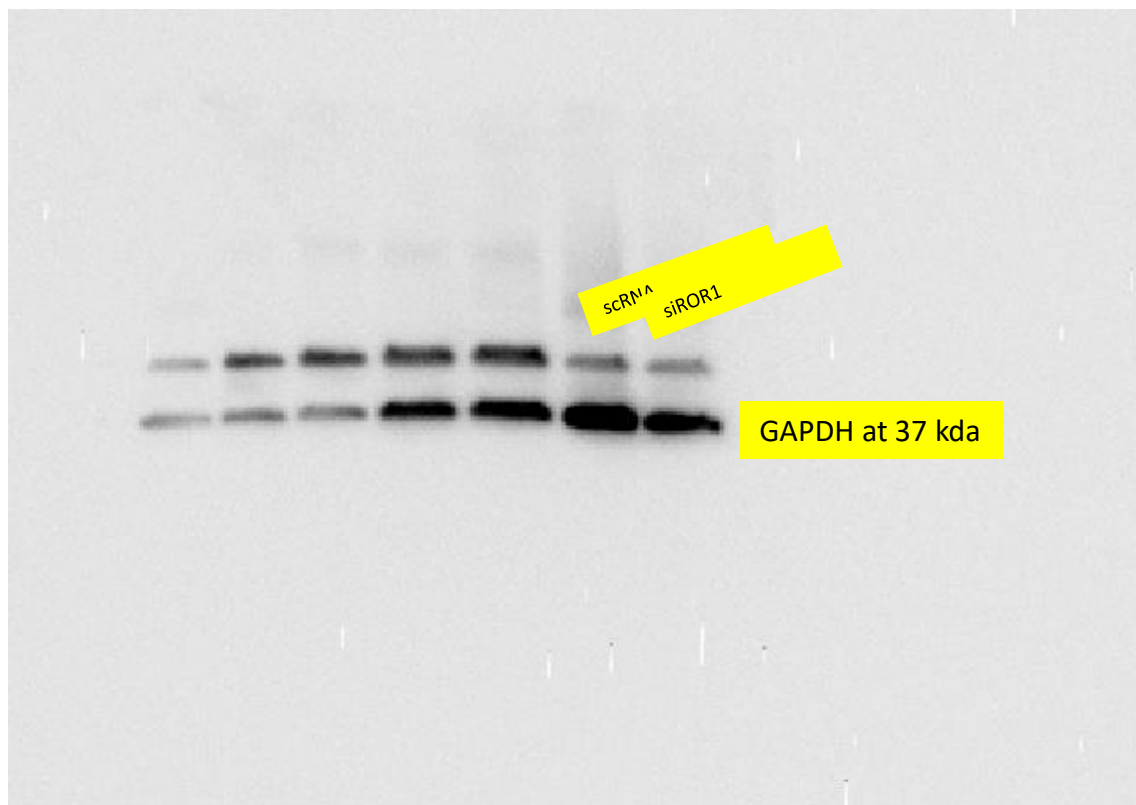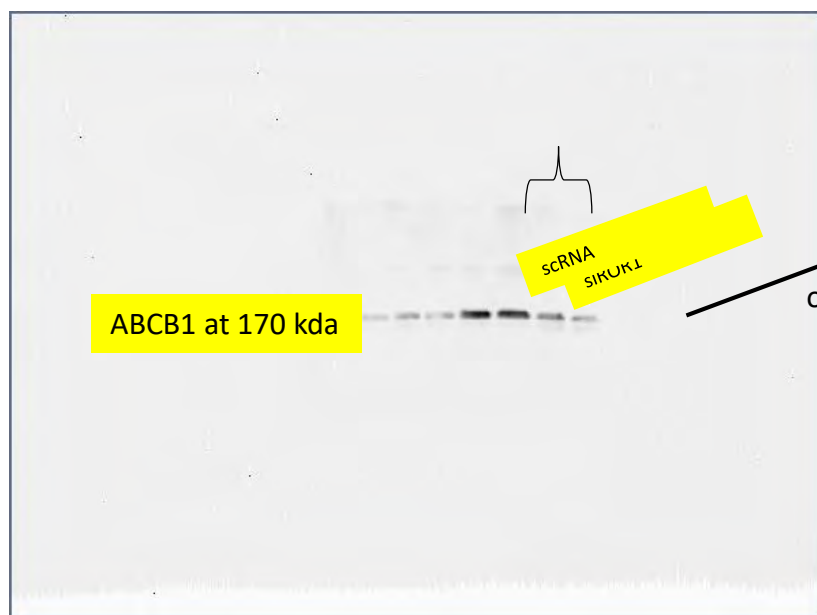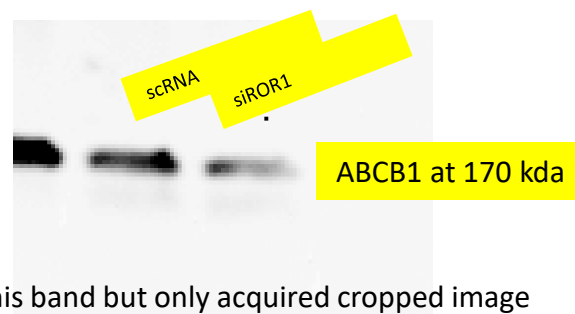

overexposed this band but only acquired cropped image

# Supporting gel data figure S3B

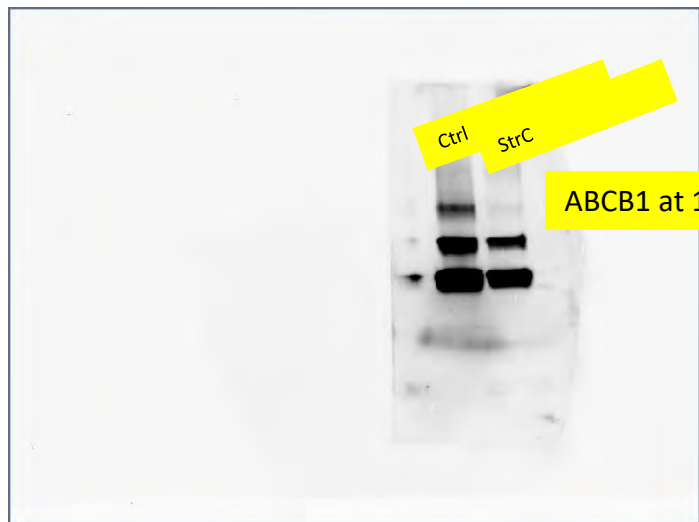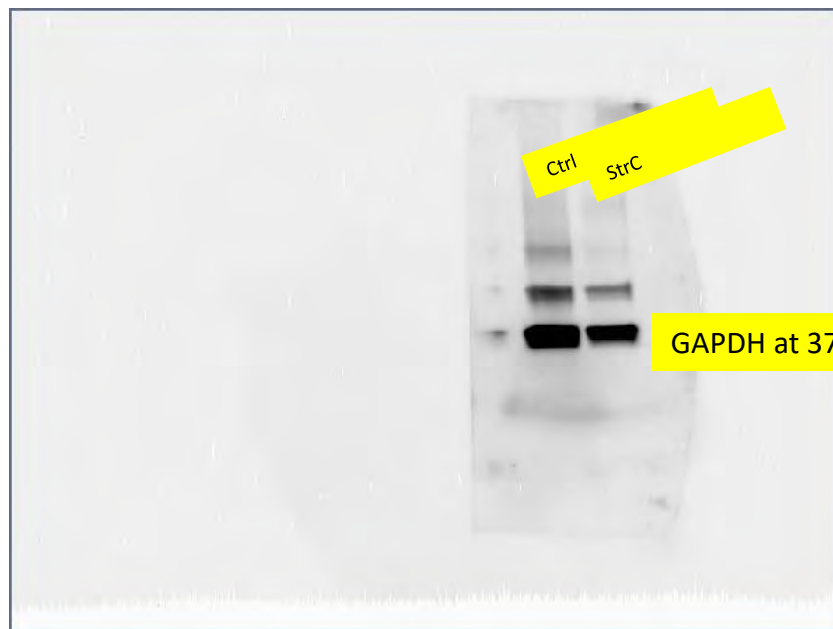

## Supporting gel data figure S5A

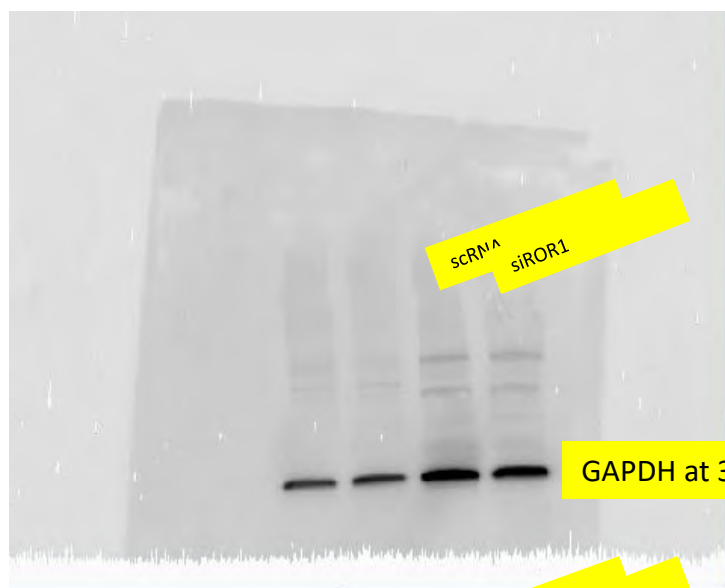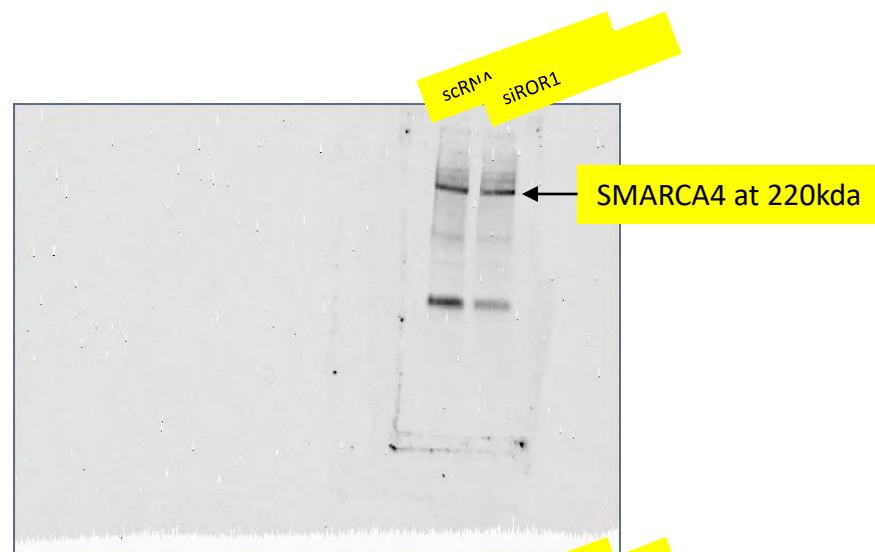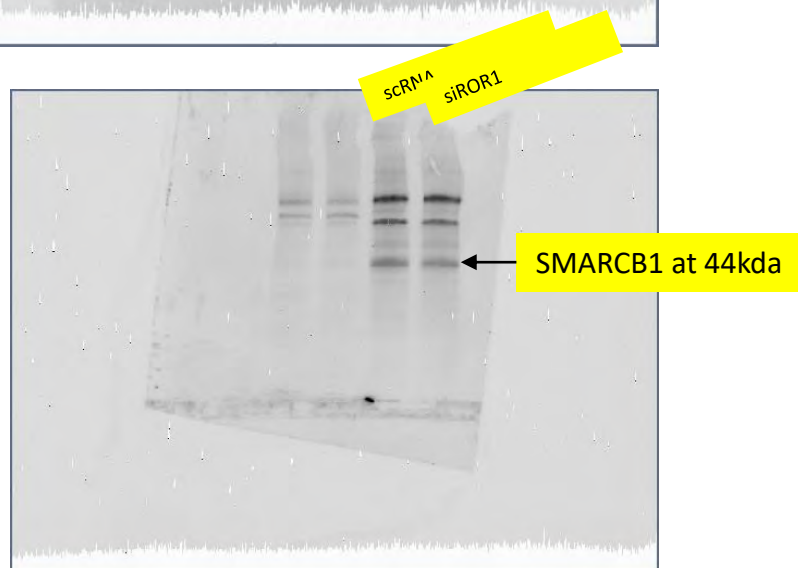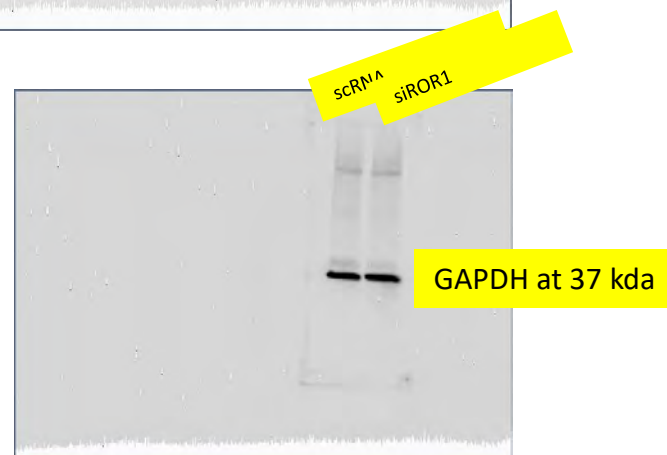

# Supporting gel data figure S5B

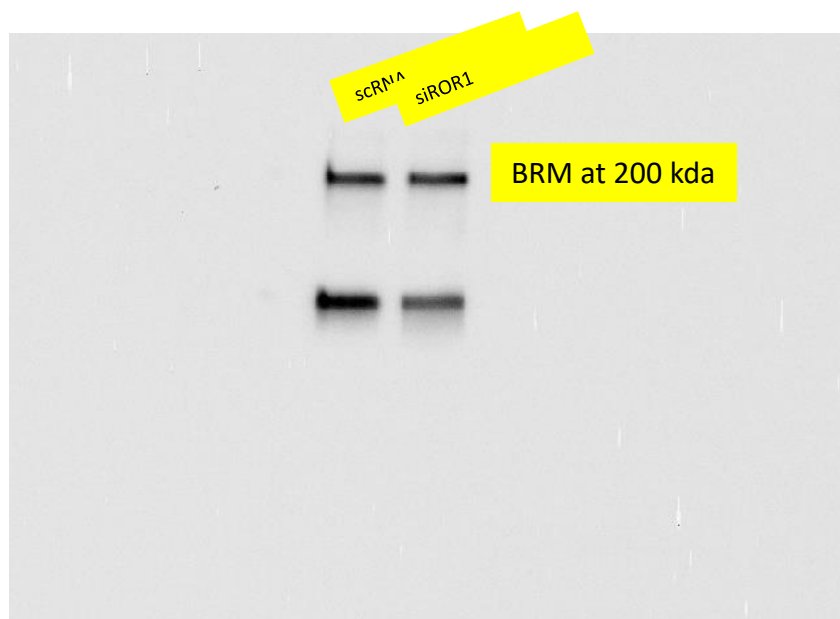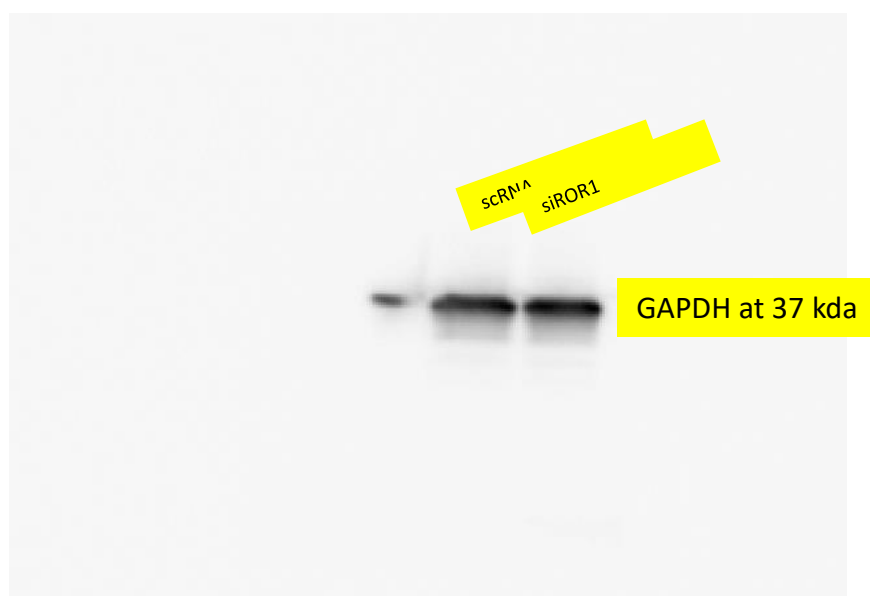

**Figure S1. ROR1 overexpression in ROR1-deficient MCF-7 decreases drug sensitivity** **A)** Immunoblot assessing efficacy of ROR1 knockdown via siRNA in SUM159PT/R **B)** Immunoblot assessing efficacy of ROR1 overexpression in ROR1-deficient MCF-7 luminal breast cancer line. Full length blots are presented in the supplementary figure S15 **C, D)** MTT investigating cell viability following Dox/Cis treatment in both cell lines after either ROR1 overexpression or Control vector transfection. All statistical analyses via student's t test. N = 3. \* =  $p < 0.05$  , \*\* =  $p < 0.01$

**Figure S2. ROR1 inhibition potentiates DNA damage induced by chemo drugs in SUM159PT** **A)** Immunofluorescence labelling  $\gamma$ H2A.X in SUM159PT transfected with either siROR1 or control RNA then treated with Dox or vehicle control (DMSO). **B)** ImageJ quantification of individual  $\gamma$ H2A.X foci in nuclei from images obtained in (A). **C)** Overall nuclear  $\gamma$ H2A.X

expression (mean fluorescence intensity), calculated using ImageJ, of cells imaged in **(A)**. Statistical analyses were performed using Student's t test. \* =  $p < 0.05$ , \*\* =  $p < 0.01$ .

**Figure S3. ROR1 inhibition represses ABCB1 expression in SUM-159PT** **A, B)** Immunoblot assessing ABCB1 protein expression after ROR1 knockdown via siRNA (A) or ROR1 inhibition with StrC (B) in SuM-159PT. Full length blots are presented in the supplementary figure S16 and S17.

**Figure S4. ROR1 overexpression in ROR1-deficient MCF-7 increases ABCB1 transcription** **A, B)** qPCR investigating ROR1 and ABCB1 mRNA levels in ROR1-deficient MCF-7 following ROR1 overexpression. All statistical analyses via student's t test. N = 3. \*\*\* =  $p < 0.001$  , \*\*\*\* =  $p < 0.0001$

**Figure S5. ROR1 inhibition does not affect expression of SWI/SNF complex members** **A, B)** Immunoblots assessing expression of other SWI/SNF complex members after ROR1 siRNA knockdown. Full length blots are presented in the supplementary figure S18 and S19.

**Figure S6. ROR1 inhibition represses drug efflux in SUM159PT.** **A, C)** Fluorescence confocal microscopy monitoring doxorubicin (red) in SUM159PT nuclei (DAPI/blue) following treatment, after ROR1 knockdown (A) or inhibition with StrC (C). **B,D)** ImageJ quantification of Doxorubicin within nuclei (mean fluorescence intensity) from images obtained in (A) and (C). Statistical analyses via student's t test. N = 3.  $p < 0.05$  considered statistically significant.

**Figure S7. Supporting full length blot data for Fig 1D**

**Figure S8. Supporting full length blot data for Fig 2A**

**Figure S9. Supporting full length blot data for Fig 4A**

**Figure S10. Supporting full length blot data for Fig 5B**

**Figure S11. Supporting full length blot data for Fig 5B**

**Figure S12. Supporting full length blot data for Fig 6B**

**Figure S13. Supporting full length blot data for Fig 6B**

**Figure S14. Supporting full length blot data for Fig 6C**

**Figure S15. Supporting full length blot data for Fig S1A**

**Figure S16. Supporting full length blot data for Fig S3A**

**Figure S17. Supporting full length blot data for Fig S3B**

**Figure S18. Supporting full length blot data for Fig S5A**

**Figure S19. Supporting full length blot data for Fig S5B**
